# Supplementary figures and images for: Electrocardiographic abnormalities associated with acute glyphosate toxicity
Source: PubMed Central journal article supplement — HeartRhythm Case Rep. 2019 Nov 2;6(2):63–6. doi: 10.1016/j.hrcr.2019.10.014 (PMC7026525; doi:10.1016/j.hrcr.2019.10.014), 2019-11-02

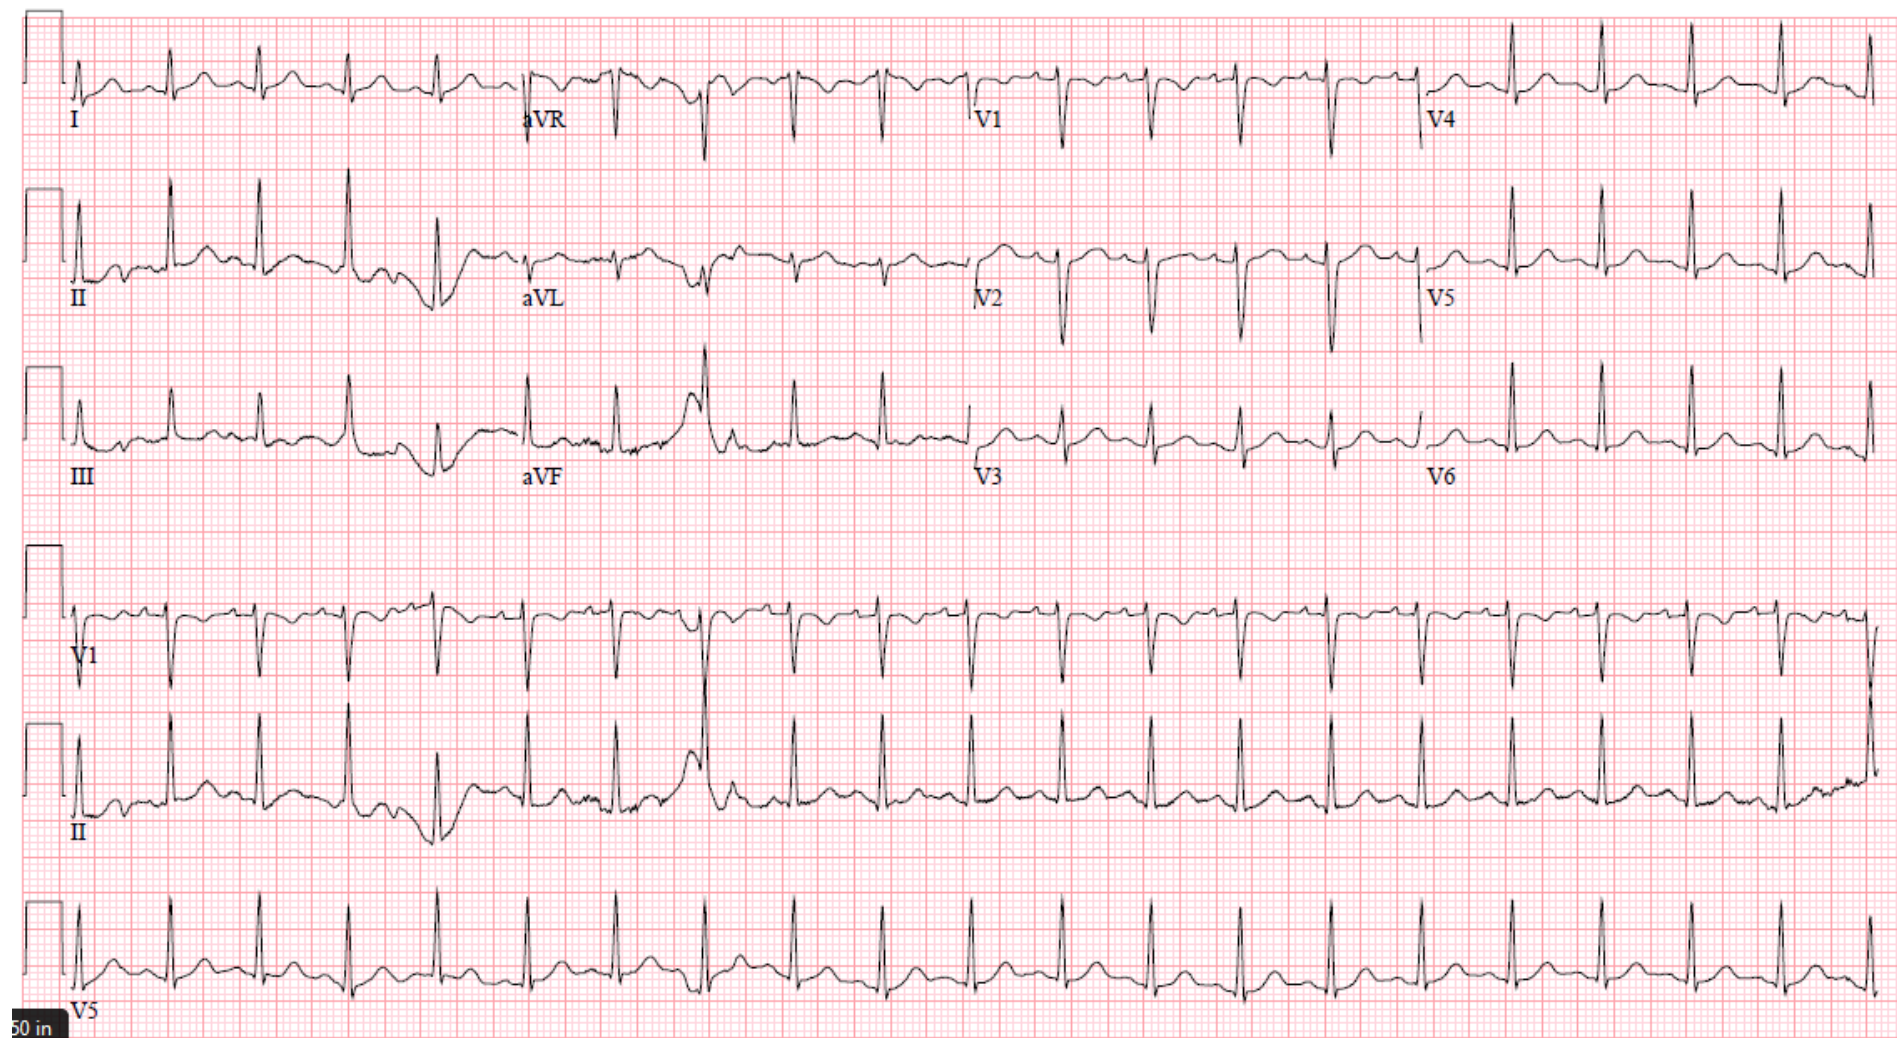

Supplemental Figure

Supplement: mmc1.pdf [file mmc1.pdf]
